# Supplementary material for: Immune characterization of metastatic colorectal cancer patients post reovirus administration
Source: BMC Cancer. 2020 Jun 18;20:569. doi: 10.1186/s12885-020-07038-2 (PMC7301987; doi:10.1186/s12885-020-07038-2)
Supplement: Supplementary file 1 — Additional file 1: Supplementary Table 1. List of immune related genes analyzed by transcriptome assay. [file 12885_2020_7038_MOESM1_ESM.pdf]

**Supplementary Table 1: List of immune related genes analyzed by transcriptome assay.**

| Gene Symbol |         |    |           |      |           |      |          |      |         |        |          |       |           |       |          |      |           |          |          |      |          |        |          |       |          |           |          |      |         |       |          |       |          |          |
|-------------|---------|----|-----------|------|-----------|------|----------|------|---------|--------|----------|-------|-----------|-------|----------|------|-----------|----------|----------|------|----------|--------|----------|-------|----------|-----------|----------|------|---------|-------|----------|-------|----------|----------|
| 1           | S100A8  | 51 | MAPPKAPK1 | 101  | CD44      | 151  | ISG15    | 201  | HCK     | 251    | FCGR3A   | 301   | TLR6      | 351   | CD24     | 401  | DDX50     | 451      | IL26     | 501  | CD3EAP   | 551    | LEC4A    | 601   | IRF3     | 651       | PTGDR2   | 701  | NOD2    | 751   | CTCF1    | 801   | TPSAB1   |          |
| 2           | ITGB8   | 1  | CDU       | MIR6 | 102       | GNLY | 152      | LY86 | 202     | ICOSLG | 252      | IL1RN | 302       | IKBKG | 352      | CD38 | 402       | ITAG16-B | 452      | DDI1 | 502      | MAGEC2 | 552      | IGF2R | 602      | TNFRSF13B | 652      | IL16 | 702     | IL3RA | 752      | SMPD3 | 802      | TNFRSF18 |
| 3           | FCER1G  | 53 | TGFB1     | 103  | NCFA      | 153  | ETSL     | 203  | GZMA    | 253    | CR2      | 303   | IL10      | 353   | MSR1     | 403  | TME67-IT1 | 453      | TOLLIP   | 503  | MPPED1   | 553    | TLA      | 603   | CSFR3    | 653       | CDXK3    | 703  | TNFRSF9 | 753   | CD1A     | 803   | LAG3     |          |
| 4           | RP56    | 54 | EDC3      | 104  | IFJ35     | 154  | C        | 204  | SPAL7   | 254    | PMCH     | 304   | KLRG1     | 354   | CXCL13   | 404  | BLK       | 454      | GAGE1    | 504  | SMAD3    | 554    | CCLR2    | 604   | CD181    | 654       | POU2AF1  | 704  | CEACAM8 | 754   | TNF      | 804   | CCL3     |          |
| 5           | S100A12 | 55 | HLA-C     | 105  | IAK5      | 155  | CBCL21   | 205  | CSF1R   | 255    | PSFZ8    | 305   | PRPF38A   | 355   | POU2F2   | 405  | MNKL1     | 455      | GAPATH3  | 505  | ENG      | 555    | ZKSCAN5  | 605   | XCR2     | 655       | KLRC2    | 705  | CEAMK   | 755   | NOD1     | 805   | CCL4     |          |
| 6           | PPBP    | 56 | CXCR4     | 106  | TLR1      | 156  | SDHA     | 206  | FECR2   | 256    | ROPN1    | 306   | CYLD      | 356   | KLK1     | 406  | CAMP      | 456      | MAGEA16  | 506  | SIGIRR   | 556    | PPARG    | 606   | CD59     | 656       | CXCR3    | 706  | REL     | 756   | SPINK5   | 806   | ITGA5    |          |
| 7           | CD55    | 57 | ITGAE     | 107  | ITGAB2    | 157  | LEC7A    | 207  | PYCARD  | 257    | IFI27    | 307   | TIGIT     | 357   | MURD1    | 407  | TNFSF4    | 457      | CD14     | 507  | SVCY1    | 557    | IL22RA2  | 607   | CDL28    | 657       | CD274    | 707  | WNTFAC1 | 757   | TLR2     | 807   | CTLA5    |          |
| 8           | UBF2    | 58 | CYBB      | 108  | TNFRSF13B | 158  | XCCL5    | 208  | TAPBP   | 258    | CD79B    | 308   | MMP3K7    | 358   | CD34     | 408  | ATG16L1   | 458      | SPN      | 508  | BLNK     | 558    | PGI      | 608   | PIR1     | 658       | CD44     | 708  | IRF7    | 758   | IL17RA   | 808   | TMEF2    |          |
| 9           | ATC     | 59 | MTMR14    | 109  | HLA-E     | 159  | CCL7     | 209  | TLRS    | 259    | CD276    | 309   | HAVCR2    | 359   | IL1RAPL2 | 409  | ECISIT    | 459      | IL13     | 509  | NTE5     | 559    | CD40     | 609   | FHVH     | 659       | CFP      | 709  | IRF8    | 759   | IL18     | 809   | MCCR1    |          |
| 10          | CD53    | 60 | CASP3     | 110  | IL32      | 160  | EP300    | 210  | MI      | 260    | IL7R     | 310   | MAGEA4    | 360   | MSA1     | 410  | CD8A      | 460      | LEC4C    | 510  | ICAM1    | 560    | CXCL3    | 610   | EIF2B4   | 660       | ARG2     | 710  | AP0E    | 760   | CTLA4    | 810   | ADA      |          |
| 11          | PP3A    | 61 | REL       | 111  | TREM1     | 161  | TLR7     | 211  | CNPS5   | 261    | STAT6    | 311   | MAGEB2    | 361   | TNFSF8   | 411  | CD19      | 461      | NOTCH1   | 511  | MMP4K2   | 561    | KLX13    | 611   | IGFBP    | 661       | CTC1     | 711  | TREM2   | 761   | TNFRSF11 | 811   | CTSH     |          |
| 12          | BLNK    | 62 | F31A1     | 112  | LRRN3     | 162  | C48      | 212  | SIGLEC1 | 262    | KLRP1    | 312   | IL6       | 362   | IL22     | 412  | INPP5D    | 462      | ALAS1    | 512  | MICA     | 562    | CXCR5    | 612   | IRGM     | 662       | CREB5    | 712  | IL17R   | 762   | CXCR6    | 812   | GTF3C1   |          |
| 13          | CD63    | 63 | CN42      | 113  | LRRG2     | 163  | ITGAM    | 213  | SPN     | 263    | KLRB1    | 313   | MRPS5     | 363   | CASP8    | 413  | STAT5B    | 463      | LY9      | 513  | SLC110   | 563    | TLT      | 613   | STAT4    | 663       | FLT3     | 713  | DOCK9   | 763   | CSF2     | 813   | SYK      |          |
| 14          | FA2H    | 64 | CD48      | 114  | PLAU      | 164  | ITGA1    | 214  | CD82    | 264    | BT2      | 314   | IL15      | 364   | TNFSF13  | 414  | HLA-E     | 464      | SLA      | 514  | SLA8A    | 564    | RORA     | 614   | MMPAK3K1 | 664       | MYD88    | 714  | CD14    | 764   | IKCB     | 814   | PDGFRB   |          |
| 15          | ITNAV5  | 65 | CCXCL16   | 115  | HLA-DQB1  | 165  | PDCD1    | 215  | MN      | 265    | IL7      | 315   | MSR1      | 365   | RUNX1    | 415  | IL25      | 465      | IL1RAP   | 515  | CD45     | 565    | IL1RAP   | 615   | CD3E     | 665       | CD3E     | 715  | CD3E    | 765   | CD3E     | 815   | CD3E     |          |
| 16          | TNFR1   | 66 | PRKCE     | 116  | CD1C      | 166  | CD1C     | 216  | FYN     | 266    | AKK1     | 316   | CTK       | 366   | AMBP     | 416  | IL26      | 466      | CR6      | 516  | BAGE5    | 566    | TPTE     | 616   | CD3E     | 666       | CD3E     | 716  | CD3E    | 766   | CD3E     | 816   | CD3E     |          |
| 17          | IFI16   | 67 | CD68      | 117  | TUBB8     | 167  | PIK3CD   | 217  | GZMB    | 267    | CR1      | 317   | PPR2      | 367   | CNOT4    | 417  | MMP3K5    | 467      | VCAM1    | 517  | MGEF8    | 567    | CD200    | 617   | C5       | 667       | TNFRSF10 | 717  | PRG2    | 767   | MASP3    | 817   | ELANE    |          |
| 18          | CD37    | 68 | HLA-DPB1  | 118  | TNFRSF12  | 168  | FCGR2B   | 218  | NCR1    | 268    | POLR2A   | 318   | IL4R      | 368   | TAG1B    | 418  | TLR1      | 468      | CD207    | 518  | IL26     | 568    | DGGR1    | 618   | IL6R     | 668       | ITCAM1   | 718  | LPB1    | 768   | TBP      | 818   | NEFL     |          |
| 19          | PTPRC   | 69 | KRAS      | 119  | PDGFC     | 169  | BC16     | 219  | CTCF    | 269    | BRAF     | 319   | ULR1A     | 369   | CD40LG   | 419  | GUSB      | 469      | IL2      | 519  | CNCD3    | 569    | STC2     | 619   | CD160    | 669       | CD4      | 719  | C8A     | 769   | TLR9     | 819   | RRAD     |          |
| 20          | HLA-DRA | 70 | INPP5D    | 120  | HLA-A     | 170  | CCR2     | 220  | BST1    | 270    | IFI1     | 320   | CD1E      | 370   | RELA     | 420  | IRF5      | 470      | TLR4     | 520  | CCL23    | 570    | CREB1    | 620   | ATG16L1  | 670       | MAVS     | 720  | IL28    | 770   | TRIM25D5 | 820   | ICAM     |          |
| 21          | IFTM1   | 71 | IKBKE     | 121  | CHIT1     | 171  | SELPGL   | 221  | IL5     | 271    | CDK1     | 321   | CD83      | 371   | PTGS2    | 421  | FCGR1A    | 471      | IKBKB    | 521  | IL17F    | 571    | MEFV     | 621   | CD27     | 671       | SAP130   | 721  | CEBPB   | 771   | IL13     | 821   | INPP5D   |          |
| 22          | IFTM2   | 72 | ATM       | 122  | CD163     | 172  | CTAGE1   | 222  | IL17A   | 272    | TNFRSF11 | 322   | C5B       | 372   | CHUK     | 422  | INPP5D    | 472      | HPRT1    | 522  | CCL3     | 572    | LAMP3    | 622   | SERPING1 | 672       | CTA-109P | 722  | TLR7    | 772   | CD2      | 822   | NPSP1    |          |
| 23          | CDL27   | 73 | PECAM1    | 123  | ATG12     | 173  | IL34     | 223  | CD247   | 273    | SLC11A1  | 323   | TNFRSF13B | 373   | IL21     | 423  | CSF3R     | 473      | SEMG1    | 523  | ITGAX    | 573    | IRAK2    | 623   | BSLB10   | 673       | IL12A    | 723  | EB1     | 773   | IFNB1    | 823   | IL2L2A   |          |
| 24          | CC74    | 74 | PSMD7     | 124  | HLA-DMA   | 174  | HLA-G    | 224  | INPP5D  | 274    | ABCF1    | 324   | PKNOX     | 374   | SLAMF6   | 424  | IL38R1    | 474      | DUSP4    | 524  | SPPI     | 574    | TRAC     | 624   | PMB10    | 674       | C4BPA    | 724  | COL3A1  | 774   | PMR1     | 824   | CCL41    |          |
| 25          | CD99    | 75 | DDP4      | 125  | DDX58     | 175  | NFATC3   | 225  | IAK5    | 275    | GATA3    | 325   | ITGA6     | 375   | IL15RA   | 425  | IL11      | 475      | IL25     | 525  | ATG16L1  | 575    | CXCL2    | 625   | AMMECR1  | 675       | SPANKB1  | 725  | INPP5D  | 775   | TFEB     | 825   | ITGAL    |          |
| 26          | CD99    | 76 | NKRAS     | 126  | ISG20     | 176  | CCR7     | 226  | CEACAM6 | 276    | ATG16L1  | 326   | ATG16L1   | 376   | RIPK2    | 426  | CD209     | 476      | TLR8     | 526  | TNFRSF14 | 576    | INPP5D   | 626   | C9       | 676       | ATG16L1  | 726  | LCK     | 776   | DHX16    | 826   | TAB1     |          |
| 27          | MMPK8   | 77 | MMP2K4    | 127  | PSMB9     | 177  | EMOES    | 227  | ITGA2   | 277    | CCL2     | 327   | FLT3LG    | 377   | SLAMF7   | 427  | CD6       | 477      | ULR4S    | 527  | CTIR     | 577    | TANK     | 627   | CEK2     | 677       | CCRS     | 727  | GZMM    | 777   | IL2RB2   | 827   | SH2B2    |          |
| 28          | CTSS    | 78 | LAMP2     | 128  | FNAR1     | 178  | CD164    | 228  | CFI     | 278    | C1QA     | 328   | SLEL      | 378   | IL18     | 428  | MICB      | 478      | IL28B    | 528  | FOXO3    | 578    | CC18     | 628   | MELT6    | 678       | TRIM39   | 728  | CLL1    | 778   | SHD181   | 828   | NUF107   |          |
| 29          | MEF2C   | 79 | MYO19     | 129  | CD163     | 179  | CD163    | 229  | CHUC    | 279    | BTX      | 329   | IL34      | 379   | SLEL     | 429  | IL6R      | 479      | IL6R     | 529  | IL6R     | 579    | CD3E     | 629   | CD3E     | 679       | CD3E     | 729  | CD3E    | 779   | CD3E     | 829   | TNFRSF11 |          |
| 30          | CD99    | 80 | GGP3      | 130  | HLA-DQA1  | 180  | CD163    | 230  | ATG16L1 | 280    | CD163    | 330   | CD3E      | 380   | GZMH     | 430  | IL18      | 480      | IL18     | 530  | CD3E     | 580    | CD3E     | 630   | CD3E     | 680       | CD3E     | 730  | CD3E    | 780   | CD3E     | 830   | MMP4K2   |          |
| 31          | NFKBIA  | 81 | KLRCA-KLR | 131  | MX1       | 181  | FAS      | 231  | PRF1    | 281    | IRF1     | 331   | CDC5A     | 381   | VEGFC    | 431  | ATG16L1   | 481      | IRF4     | 531  | S100A7   | 581    | ELK1     | 631   | CASP10   | 681       | FZRL1    | 731  | IL1CB1  | 781   | MTS1R    | 831   | FN1      |          |
| 32          | CND3    | 82 | IL16      | 132  | BID       | 182  | ATG7     | 232  | CDK3    | 282    | TNFRSF15 | 332   | HLA-DPA1  | 382   | CDKN1A   | 432  | ATG16L1   | 482      | CDMMO3   | 532  | INPP5D   | 582    | ITGB2    | 632   | RUNX3    | 682       | MMPK11   | 732  | IL2R    | 782   | CSF3     | 832   | CHIT1    |          |
| 33          | AKT3    | 83 | EWRS1     | 133  | ATGS      | 183  | TNFRSF1A | 233  | ZNF143  | 283    | LAIR2    | 333   | LAMP1     | 383   | TGFB     | 433  | ATG16L1   | 483      | CD11     | 533  | USP9Y    | 583    | DMBT1    | 633   | INPP5D   | 683       | IL11RA   | 733  | IL2R    | 783   | SLAMF6   | 833   | CDMA     |          |
| 34          | CD3E    | 84 | KAP1      | 134  | CD40A2RA  | 184  | ITFAIP3  | 234  | PSMB7   | 284    | CD81     | 334   | LTK       | 384   | TLR3     | 434  | TNFRSF13  | 484      | ITGAM    | 534  | IFNA8    | 584    | HLA-DQB1 | 634   | HLR3     | 684       | CXCL9    | 734  | TNFSF11 | 784   | ATG16L1  | 834   | NLRCS5   |          |
| 35          | ADNP32B | 85 | OKAP1     | 135  | LYN       | 185  | FCER1A   | 235  | INPP5D  | 285    | NFATC2   | 335   | ATG16L1   | 385   | CCL3     | 435  | PIK3CG    | 485      | SERPINB2 | 535  | TMUB2    | 585    | MMPK41   | 635   | CD13     | 685       | CD13     | 735  | IFNA1   | 785   | SNBO2    | 835   | TNFRSF17 |          |
| 36          | HLA-DMB | 86 | ITGB3     | 136  | IL1R2     | 186  | RUNX3    | 236  | INPP5D  | 286    | ICOSLG   | 336   | IL1R1     | 386   | MMPK3    | 436  | BC12      | 486      | KLR1     | 536  | STL      | 586    | SP011    | 636   | CD28     | 686       | ONAI1C4  | 736  | CD18    | 786   | THBD     | 836   | PASPD    |          |
| 37          | SELL    | 87 | CD74      | 137  | ZNF205    | 187  | MARCO    | 237  | CSF1    | 287    | ATG16L1  | 337   | ICAM2     | 387   | CD9A     | 437  | NCAM1     | 487      | PIN1     | 537  | CD200    | 587    | TRAF6    | 637   | CD3A3    | 687       | CD70     | 737  | ATG16L1 | 787   | EPN1     | 837   | HAMP1    |          |
| 38          | CP1     | 88 | IL18RAP   | 138  | ITL7      | 188  | NRP1     | 238  | ILAK1   | 288    | CXCR1    | 338   | CD3G      | 388   | REPS1    | 438  | AIRE      | 488      | CCL17    | 538  | IGF1R    | 588    | ATF4     | 638   | ATG16L1  | 688       | MSA42    | 738  | INPP5D  | 788   | CCL14    | 838   | IL27     |          |
| 39          | HMG1B1  | 89 | ILUR2     | 139  | BAX       | 189  | STAT1    | 239  | IRAK1   | 289    | AICDA    | 339   | MMPK3     | 389   | PAX5     | 439  | IFNA7     | 489      | TBX21    | 539  | POU2AF1  | 589    | CFD      | 639   | CD16L2   | 689       | L9       | 739  | IL3RA   | 789   | TLR4     | 839   | MASP2    |          |
| 40          | ANXA1   | 90 | CD46      | 140  | VEGFA     | 190  | PSEN2    | 240  | SH2D1B  | 290    | TRAF2    | 340   | NCAM1     | 390   | AXL      | 440  | ILR2      | 490      | THYOF2   | 540  | LGALS3   | 590    | CD80     | 640   | IFL      | 690       | CD9      | 740  | PSN1    | 790   | COLEC12  | 840   | SYT17    |          |
| 41          | HLA-B   | 91 | TLT8      | 141  | TALL1     | 191  | TNFSF10  | 241  | MBL2    | 291    | EGR2     | 341   | MIF       | 391   | S100B    | 441  | TNFSF14   | 491      | CDMA1    | 541  | IL2RA    | 591    | CD89     | 641   | CD108    | 691       | PBK      | 741  | TRAP1   | 791   | CFB      | 841   | COG1     |          |
| 42          | CCL5    | 92 | STAT3     | 142  | IL10RA    | 192  | ITGB2    | 242  | CCL19   | 292    | STAT5B   | 342   | KRAS      | 392   | CD3A1    | 442  | OAS3      | 492      | EPCAM    | 542  | FADD     | 592    | IFNA2    | 642   | IL23R    | 692       | CYP2P2   | 742  | ATG16L1 | 792   | SAI1     | 842   | SPARC    |          |
| 43          | PLAUR   | 93 | USP99     | 143  | INPP5D    | 193  | CXCR2    | 243  | IL13RA2 | 293    | BATF     | 343   | PLA2G6    | 393   | ZC3H1    | 443  | ATG16L1   | 493      | RORA     | 543  | CARD11   | 593    | MAF      | 643   | TR1      | 693       | ZNF346   | 743  | SH2D1A  | 793   | AZM      | 843   | HOIC3    |          |
| 44          | CD4     | 94 | CD4       | 144  | CD4       | 194  | CD4      | 244  | CD4     | 294    | CD4      | 344   | CD4       | 394   | CD4      | 444  | CD4       | 494      | CD4      | 544  | CD4      | 594    | CD4      | 644   | CD4      | 694       | CD4      | 744  | CD4     | 794   | CD4      | 844   | CD4      |          |
| 45          | CD96    | 95 | BAGE      | 145  | PNMA1     | 195  | MMP2K2   | 245  | TFR3    | 295    | IFNL1    | 345   | ERCC3     | 395   | CTSA1    | 445  | IL13RA1   | 495      | ANG1     | 545  | IL21     | 595    | CD5      | 645   | CD5      | 695       | CD5      | 745  | CD5     | 795</ |          |       |          |          |
